# Supplementary material for: Base excision repair-mediated resistance to cisplatin in KRAS(G12C) mutant NSCLC cells
Source: PubMed Central journal article supplement (PMC4745782; doi:10.18632/oncotarget.5019), 2015-09-02
Supplement: oncotarget-06-30072-s001.pdf [file oncotarget-06-30072-s001.pdf]

## SUPPLEMENTARY INFORMATION

### Antibodies used in the study for western blotting analysis

anti-Akt #9272, anti-Akt(Ser473) #9271, anti-Akt(Thr308) #9275, anti-p70S6K(Thr389) #9206, anti-p70S6K #9202, anti-S6(Ser235/236) ribosomal protein #2211, anti-S6 ribosomal protein 2217#, anti-4E-BP1(Thr37/46) #2855, anti-4E-BP1 #9644, anti-PRAS40(Thr<sup>246</sup>) #2997, anti-PRAS40 #2691, anti-Mek1/2(Ser<sup>217/221</sup>) #9154, anti-Mek1/2 #9122 provided by Cell Signalling Technology. Anti-Atm(Ser<sup>1981</sup>) #2152-1 was obtained from Epitomics. Anti-Atm #sc23921, Anti-Actin #sc1615, anti-Erk #sc94, anti-Erk(Tyr<sup>204</sup>) #sc7383, anti-KRAS #sc30, anti-FancD2 #sc20022, and anti-Lamin B #sc6217 were obtained from Santa Cruz Biotechnology. Anti-53BP1 #NB100-304 (Novus Biologicals), anti-BACH1 #B1310 (Sigma), anti-BRCA1 #Ab-1 (Calbiochem), anti-ERCC1 #8F1 and anti-MLH1 #G168-15 (Becton Dickinson), anti-DNA polymerase beta #ab26343, anti-KU70 #S5C11, anti-PCNA #PC10 provided by Abcam, anti-RAD52 #Ab-1 (Neomarkers).

### Antibodies used in the study for Immunofluorescence microscopy and foci count

anti-53BP1 #NB100-304 (Novus Biologicals), anti-FANCD2 #ab2187 (Abcam), anti-RAD51 #H-92 (Santa Cruz Biotechnology), anti-BRCA1 #Ab-1 (Calbiochem), anti-γH2AX #JBW301 (Merck Millipore,).

### *In vivo* activity

Procedures involving animals and their care were conducted in conformity with the following laws, regulations, and policies governing the care and use of laboratory animals: Italian Governing Law (D.lgs 26/2014; Authorisation n.19/2008-A issued March 6, 2008 by Ministry of Health), Mario Negri Institutional Regulations and Policies providing internal authorisation for persons conducting animal experiments (Quality Management System Certificate – UNI EN ISO 9001:2008 – Reg. N° 8576-A), the NIH Guide for the Care and Use of Laboratory Animals (2011 edition), the EU directives and guidelines (EEC Council Directive 2010/63/UE) and in line with Guidelines for the welfare and use of animals in cancer research. Animal experiments has been reviewed and approved by the IRFMN Animal Care and Use Committee (IACUC) that includes members “ad hoc” for ethical issues. Animals were housed in the Institute’s Animal Care Facilities, which meet international standards; they are regularly checked by a certified veterinarian who is responsible for health monitoring, animal welfare supervision, experimental protocols and procedures revision.

## REFERENCE

1. Workman P, Aboagye EO, Balkwill F, Balmain A, Bruder G, Chaplin DJ, et al. Guidelines for the welfare and use of animals in cancer research. *Br J Cancer*. 2010; 102:1555–1577.

## SUPPLEMENTARY FIGURES AND TABLES

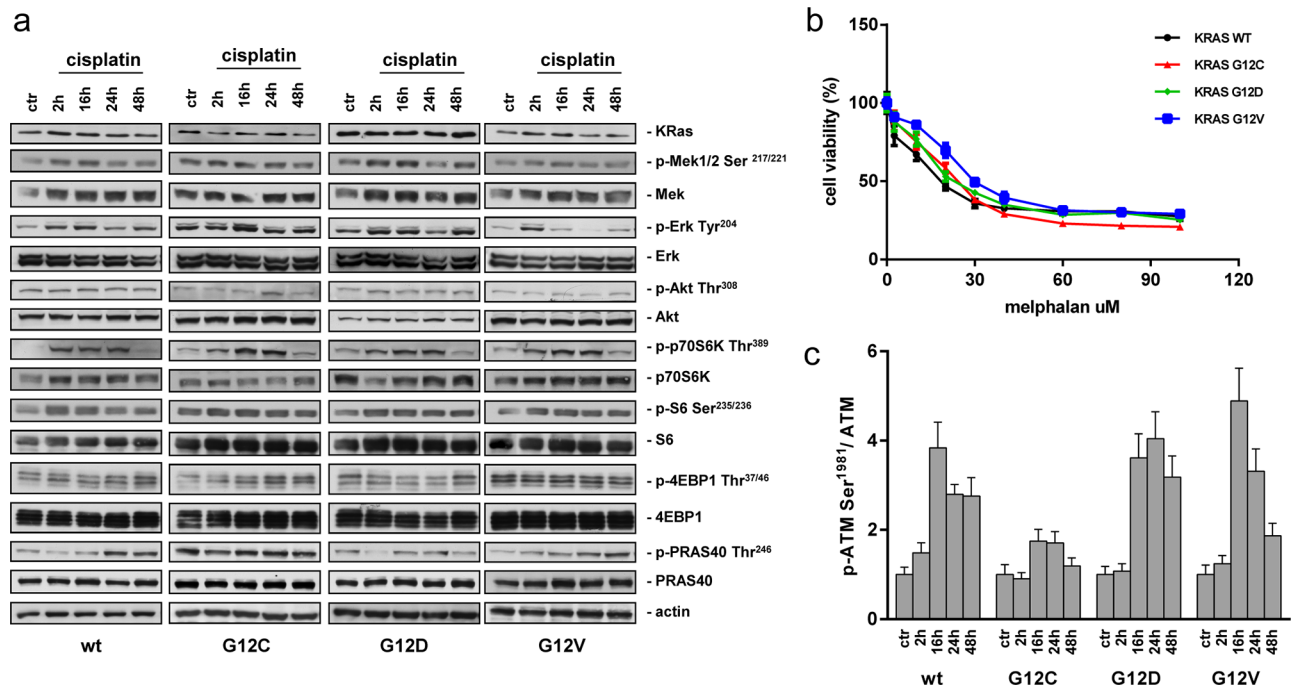

**Supplementary Figure S1:** **a.** MAPK and PI3K signalling. Representative Western blot analysis reporting the expression of different proteins belonging to the MAPK and PI3K pathways in the KRAS expressing clones treated with cisplatin estimated at the indicated time points. Actin was used as loading control. Two independent experiments have been performed. **b.** Growth inhibition assay: response of cells to melphalan treatment detected by MTS assay. The average of 3 independent experiments and SD are shown. Statistical analysis results are reported in Supplementary Table S1. **c.** Graphical presentation of ATM phosphorylation. Band intensities of p-ATM were quantified and individually normalized with unmodified ATM band intensities. Protein levels of KRAS(wt) expressing cells were set to 1 each. Quantification from 2 independent Western blots (means, SD) are shown. Statistical analysis results are reported in Supplementary Table S1.

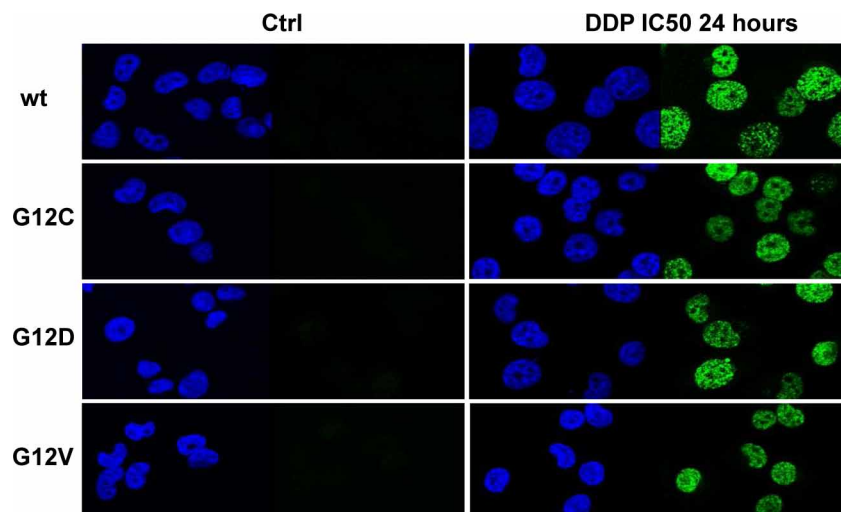

**Supplementary Figure S2:** Phosphorylation of H2AX (green) detected by immunofluorescence microscopy 24 h after cisplatin treatment for 2 h at IC<sub>50</sub> for each clone. DAPI (blue) was used to counterstain the nuclei. Scale bar: 25  $\mu$ m.

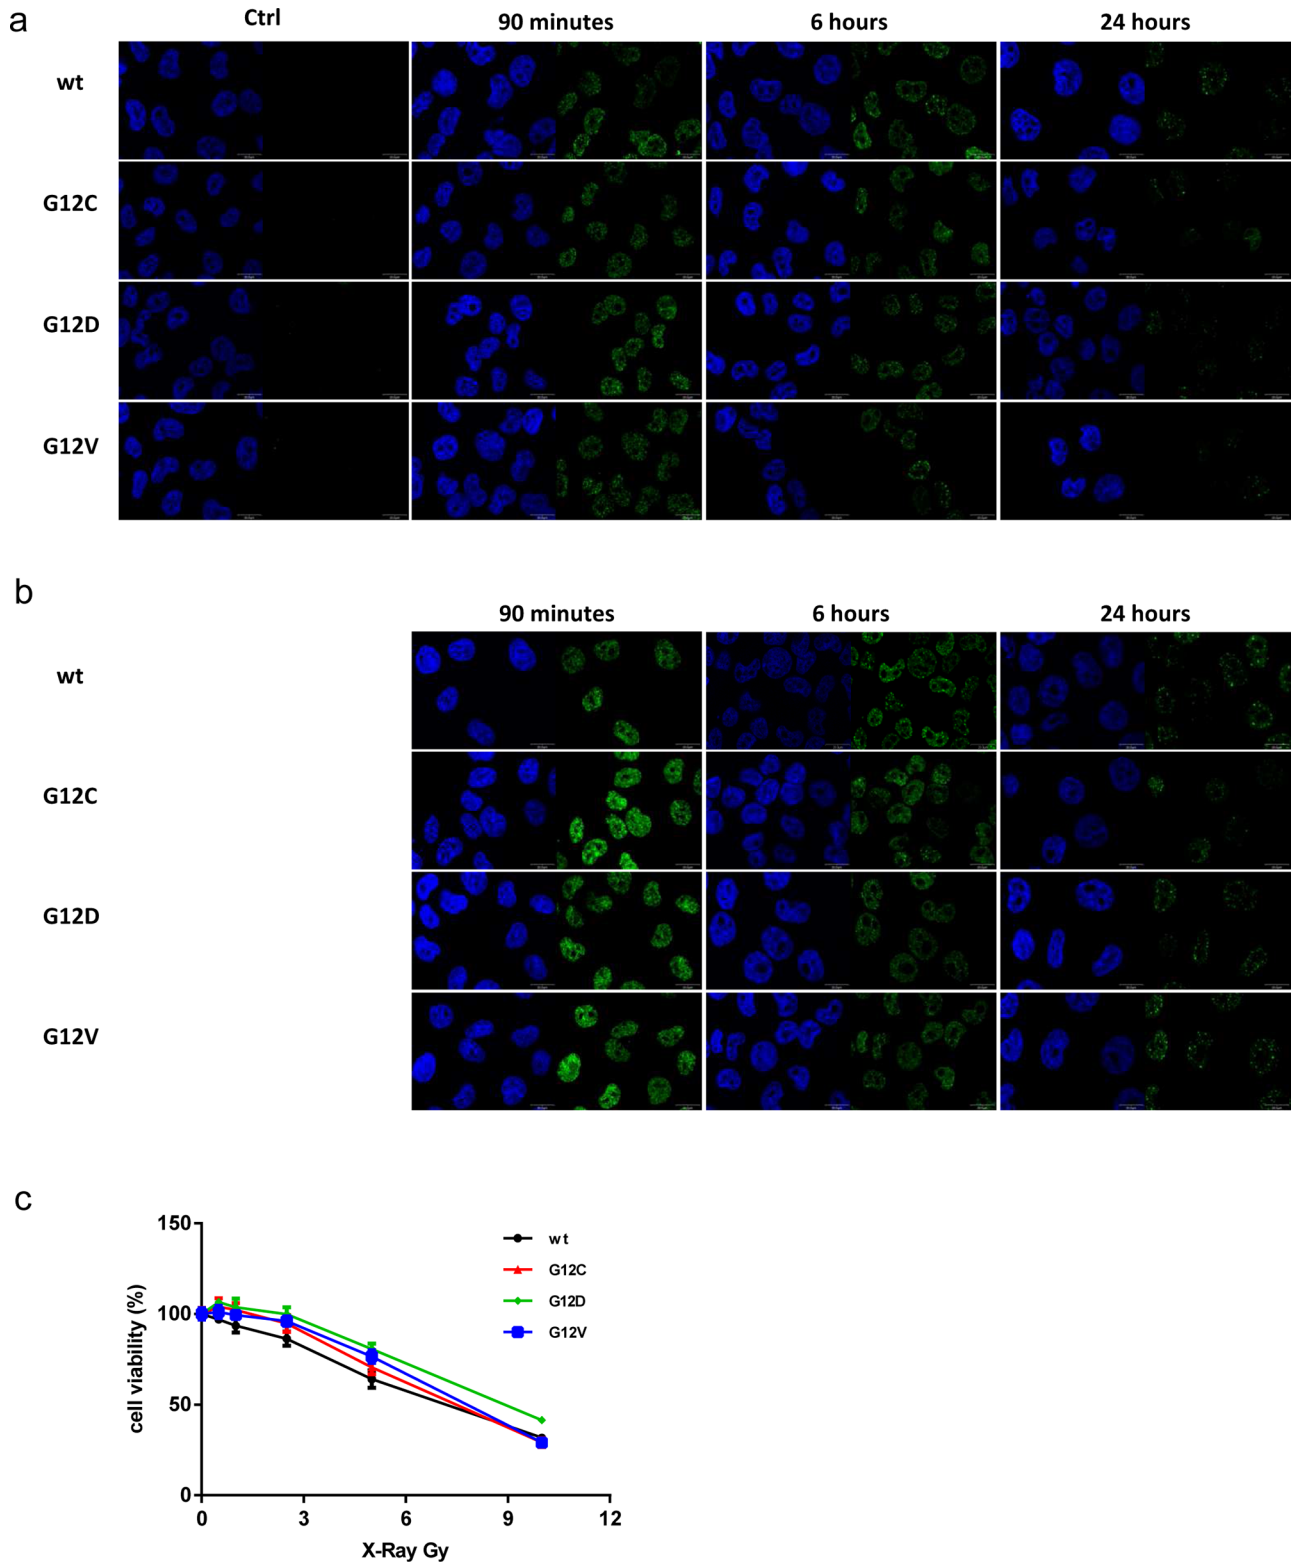

**Supplementary Figure S3: Phosphorylation of H2AX after treatment with ionizing radiation (IR).** a–b. Phosphorylation of histone H2AX (green) detected by immunofluorescence microscopy at the indicated time points after X-ray treatment with 5 (a) and 7.5 (b) Gy. DAPI (blue) was used to counterstain the nuclei. Scale bar: 25  $\mu$ m. c. Growth inhibition assay: response of cells to X-ray treatment detected by MTS assay. The average of 3 independent experiments and SD are shown. Statistical analysis results are reported in Supplementary Table S1.

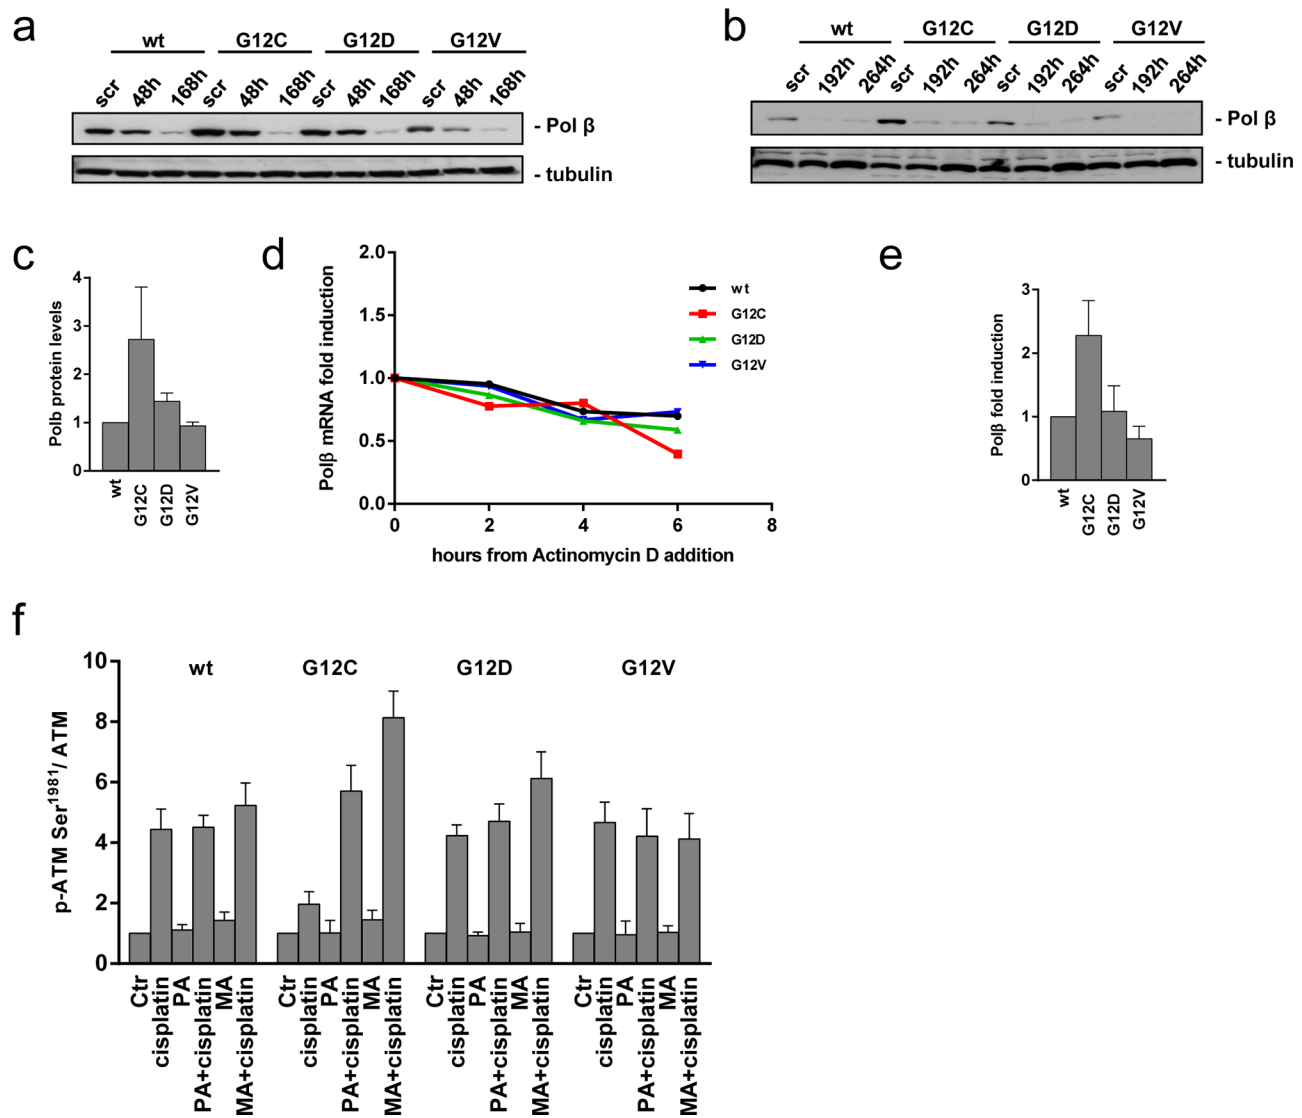

**Supplementary Figure S4:** **a.** Representative Western blot analysis showing Pol $\beta$  expression 48 h and 168 h following negative control or Pol $\beta$  siRNA transfection every 48 h. Tubulin was used as loading control. Two independent experiments have been performed. **b.** Representative Western blot analysis showing Pol $\beta$  expression 192 h and 264 h following negative control or Pol $\beta$  siRNA transfection every 48 h. Tubulin was used as loading control. Two independent experiments have been performed. **c.** Graphical presentation of Pol $\beta$ . Band intensities of Pol $\beta$  were quantified and individually normalized with tubulin band intensities. Protein levels of KRAS(wt) expressing cells were set to 1. Quantification from 5 independent Western blots (means, SD) are shown. Statistical analysis results are reported in Supplementary Table S1. **d.** Pol $\beta$  mRNA half-life determined by real time PCR at different time points after addition of actinomycin D 10  $\mu$ g/ml. **e.** Relative mRNA expression levels of Pol $\beta$  measured by real time PCR in KRAS expressing clones at basal level. Values for the KRAS(wt) clone were set to 1. The average of 2 independent experiments and SD are shown.

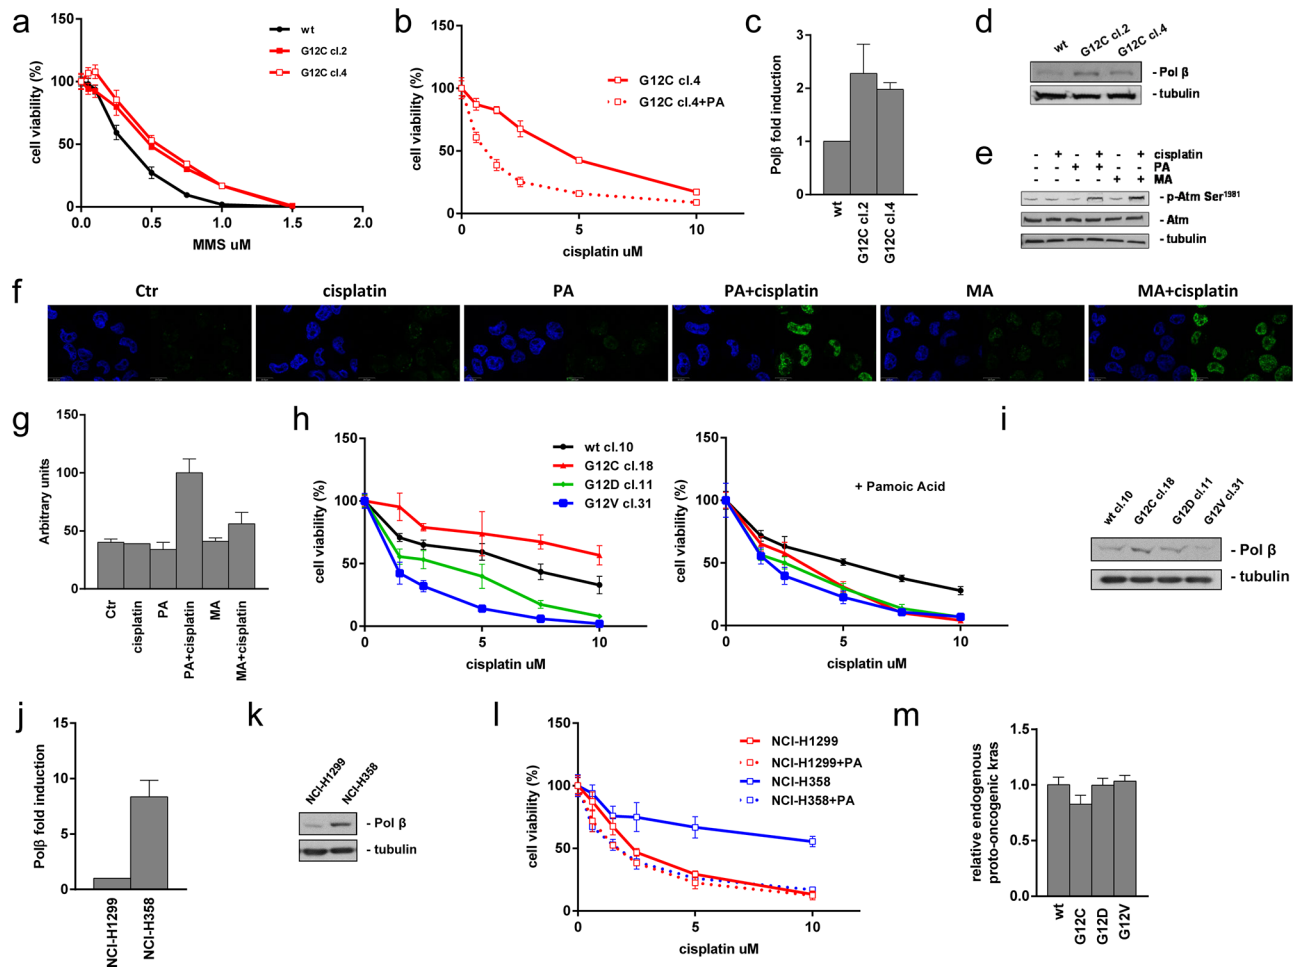

**Supplementary Figure S5:** **a.** Growth inhibition assay: response of cells to MMS treatment detected by MTS assay. The average of 3 independent experiments and SD are shown. Statistical analysis results are reported in Supplementary Table S1. **b.** Growth inhibition assay: response of cells to cisplatin or cisplatin plus PA treatment detected by MTS assay. The average of 3 independent experiments and SD are shown. **c.** Relative mRNA expression levels of Polβ measured by real time PCR in KRAS clones at basal level. Values for the KRAS(wt) clone were set to 1. The average of 3 different biological replicates and SD are shown. **d.** Representative Western blot image reporting the endogenous levels of Polβ. Tubulin was used as loading control. **e.** Representative Western blot analysis reporting the expression of and phosphorylation of ATM on serine 1981 in cells at 24 h after release from cisplatin. Tubulin was used as loading control. **f.** Phosphorylation of H2AX histone (γH2AX, green) in KRAS(G12C) cl.4 detected by immunofluorescence at 24 h after release from cisplatin, cisplatin plus MA and cisplatin plus PA. DAPI (blue) was used to counterstain the nuclei. Scale bar: 25 μm. **g.** Caspase 3 and 7 activation: KRAS(G12C) cl.4 was treated with cisplatin, cisplatin plus MA and cisplatin plus PA. 24 h after recovery caspase 3 and 7 activities were assessed by the Caspase-Glo 3/7 Assay. The average of 3 different biological replicates and SD are shown. Statistical analysis results are reported in Supplementary Table S1. **h.** Growth inhibition assay: response of cells to cisplatin or cisplatin plus PA treatment detected by MTS assay. The average of 3 independent experiments and SD are shown. Statistical analysis results are reported in Supplementary Table S1. **i.** Representative Western blot image reporting the endogenous levels of Polβ in NIH-3T3 fibroblasts expressing different KRAS mutations. Tubulin was used as loading control. **j.** Relative mRNA expression levels of Polβ measured by real time PCR in NSCLC cell lines at basal level. Values for the NCI-H1299 were set to 1. The average of 2 different biological replicates and SD are shown. **k.** Representative Western blot image reporting the endogenous levels of Polβ in NSCLC cell lines. Tubulin was used as loading control. **l.** Growth inhibition assay: response of cells to cisplatin or cisplatin plus PA treatment detected by MTS assay. The average of 3 independent experiments and SD are shown. **m.** Relative mRNA expression levels of endogenous KRAS measured by real time PCR in NCI-H1299 derived clones at basal level. Values for the wt were set to 1. The average of 2 different biological replicates and SD are shown.

**Supplementary Table S1: Statistical differences of data presented**\**p*-value < 0.05, \*\**p*-value < 0.01, \*\*\**p*-value < 0.001, \*\*\*\**p*-value < 0.0001

Figure 1b: Growth inhibition assay: response of cells to cisplatin treatment.

|                        | Cisplatin uM |     |     |      |      |      |      |      |      |
|------------------------|--------------|-----|-----|------|------|------|------|------|------|
|                        | 1            | 2,5 | 5   | 7,5  | 10   | 15   | 20   | 25   | 30   |
| wt cl4 vs. wt cl11     | ns           | ns  | ns  | ns   | ns   | ns   | ns   | ns   | ns   |
| wt cl4 vs. G12C cl2    | ns           | ns  | ns  | *    | ns   | **** | ***  | ***  | **** |
| wt cl4 vs. G12C cl4    | ns           | ns  | ns  | *    | ns   | **   | *    | ns   | ***  |
| wt cl4 vs. G12D cl2    | ns           | ns  | ns  | ns   | ns   | ns   | ns   | ns   | ns   |
| wt cl4 vs. G12D cl3    | ns           | ns  | ns  | ns   | ns   | ns   | ns   | ns   | ns   |
| wt cl4 vs. G12V cl9    | ns           | ns  | ns  | **   | ***  | ns   | **** | **   | ns   |
| wt cl4 vs. G12V cl22   | ns           | ns  | ns  | *    | **** | *    | ***  | ***  | *    |
| wt cl11 vs. G12C CL2   | ns           | ns  | *   | ns   | **   | **   | ***  | **** | **** |
| wt cl11 vs. G12C CL4   | ns           | ns  | *   | ns   | **   | ns   | *    | **   | **   |
| wt cl11 vs. G12D CL2   | ns           | ns  | ns  | ns   | ns   | ns   | ns   | ns   | ns   |
| wt cl11 vs. G12D CL3   | ns           | ns  | ns  | ns   | ns   | ns   | ns   | ns   | ns   |
| wt cl11 vs. G12V cl9   | ns           | ns  | ns  | **   | *    | **   | **** | *    | *    |
| wt cl11 vs. G12V cl22  | ns           | ns  | ns  | **   | **   | **** | ***  | **   | **   |
| G12C CL2 vs. G12C CL4  | ns           | ns  | ns  | ns   | ns   | ns   | ns   | ns   | ns   |
| G12C CL2 vs. G12D CL2  | ns           | ns  | *   | **   | *    | **   | **** | **** | **** |
| G12C CL2 vs. G12D CL3  | ns           | ns  | ns  | **   | ns   | ***  | ***  | **** | **** |
| G12C CL2 vs. G12V CL9  | ns           | ns  | *** | **** | **** | **** | **** | **** | **** |
| G12C CL2 vs. G12V CL22 | ns           | ns  | *** | **** | **** | **** | **** | **** | **** |
| G12C CL4 vs. G12D CL2  | ns           | ns  | *   | **   | *    | ns   | **   | *    | **** |
| G12C CL4 vs. G12D CL3  | ns           | ns  | ns  | **   | ns   | *    | *    | **   | **** |
| G12C CL4 vs. G12V CL9  | ns           | ns  | *** | **** | **** | **** | **** | **** | **** |
| G12C CL4 vs. G12V CL22 | ns           | ns  | *** | **** | **** | **** | **** | **** | **** |
| G12D CL2 vs. G12D CL3  | ns           | ns  | ns  | ns   | ns   | ns   | ns   | ns   | ns   |
| G12D CL2 vs. G12V CL9  | ns           | ns  | ns  | *    | **   | **   | ***  | **   | ns   |

|                        | Cisplatin uM |     |    |     |      |      |      |     |    |
|------------------------|--------------|-----|----|-----|------|------|------|-----|----|
|                        | 1            | 2,5 | 5  | 7,5 | 10   | 15   | 20   | 25  | 30 |
| G12D CL2 vs. G12V CL22 | ns           | ns  | ns | ns  | ***  | **** | **   | *** | ns |
| G12D CL3 vs. G12V CL9  | ns           | ns  | ns | *   | **** | *    | **** | ns  | ns |
| G12D CL3 vs. G12V CL22 | ns           | ns  | ns | ns  | **** | ***  | ***  | *   | ns |
| G12V CL9 vs. G12V CL22 | ns           | ns  | ns | ns  | ns   | ns   | ns   | ns  | ns |

Statistical analysis was performed using two-way ANOVA test and Bonferroni post-test for multiple comparisons.

Figure 1c: Colony formation assay: response of cells to different doses of cisplatin

|               | Cisplatin uM |      |    |      |    |
|---------------|--------------|------|----|------|----|
|               | 1            | 2,5  | 5  | 10   | 20 |
| wt vs. G12C   | ns           | ***  | *  | *    | ns |
| wt vs. G12D   | ns           | ns   | ns | ns   | ns |
| wt vs. G12V   | ns           | ns   | ns | ns   | ns |
| G12C vs. G12D | ****         | **** | ** | **** | *  |
| G12C vs. G12V | ns           | **   | ** | *    | ns |
| G12D vs. G12V | ***          | *    | ns | ns   | ns |

Statistical analysis was performed using two-way ANOVA test and Bonferroni post-test for multiple comparisons.

Figure 1d: Caspase 3 and 7 activation: wt and mutant KRAS clones were treated with cisplatin.

|               | Time after treatment start |      |      |
|---------------|----------------------------|------|------|
|               | 0                          | 24 h | 48 h |
| wt vs. G12C   | ns                         | **** | **** |
| wt vs. G12D   | ns                         | **   | **   |
| wt vs. G12V   | ns                         | *    | ns   |
| G12C vs. G12D | ns                         | ns   | **** |
| G12C vs. G12V | ns                         | **   | **** |
| G12D vs. G12V | ns                         | ns   | ns   |

Statistical analysis was performed using two-way ANOVA test and Bonferroni post-test for multiple comparisons.

Figure 2b–c: Tumor growth inhibition activity on KRAS(wt) or KRAS(G12C) expressing clones injected mice.

|                             | Days after tumor implant |    |     |    |      |      |      |
|-----------------------------|--------------------------|----|-----|----|------|------|------|
|                             | 27                       | 28 | 32  | 35 | 39   | 42   | 45   |
| wt ctr vs. wt cisplatin     | ns                       | ns | *** | ns | **** | **** | **** |
| G12C ctr vs. G12C cisplatin | ns                       | ns | ns  | ns | ns   | ns   | **   |

Statistical analysis was performed using two-way ANOVA test and Bonferroni post-test for multiple comparisons.



Figure 2d: Assessment of intracellular platinum concentration at the indicated time points after cisplatin treatment.

|               | Time after treatment start |     |      |      |      |
|---------------|----------------------------|-----|------|------|------|
|               | 2 h                        | 6 h | 16 h | 24 h | 48 h |
| wt vs. G12C   | *                          | ns  | ***  | ns   | ns   |
| wt vs. G12D   | ****                       | **  | ***  | **   | ns   |
| wt vs. G12V   | ns                         | ns  | ***  | ns   | ns   |
| G12C vs. G12D | ns                         | ns  | ns   | ns   | ns   |
| G12C vs. G12V | ns                         | ns  | ns   | ns   | ns   |
| G12D vs. G12V | *                          | ns  | ns   | ns   | ns   |

Statistical analysis was performed using two-way ANOVA test and Bonferroni post-test for multiple comparisons.

Figure 2f: Assessment of platinum adducts bound to DNA at the indicated time points after cisplatin treatment.

|               | Time after treatment start |     |      |
|---------------|----------------------------|-----|------|
|               | 2 h                        | 6 h | 24 h |
| wt vs. G12C   | ns                         | ns  | **   |
| wt vs. G12D   | ns                         | *   | ns   |
| wt vs. G12V   | ns                         | **  | **   |
| G12C vs. G12D | ns                         | ns  | *    |
| G12C vs. G12V | ns                         | ns  | ***  |
| G12D vs. G12V | ns                         | ns  | ns   |

Statistical analysis was performed using multiple *t*-test.

Figure 3e:  $\gamma$ H2AX immunolabeled foci from 2–4 slides and two independent experiments.

|               | Time after release from treatment |      |      |
|---------------|-----------------------------------|------|------|
|               | 6 h                               | 16 h | 24 h |
| wt vs. G12C   | ***                               | **** | **** |
| wt vs. G12D   | ns                                | **** | ns   |
| wt vs. G12V   | ns                                | **** | ns   |
| G12C vs. G12D | *                                 | **   | **** |
| G12C vs. G12V | **                                | **   | **** |
| G12D vs. G12V | ns                                | ns   | ns   |

Statistical analysis was performed using two-way ANOVA test and Bonferroni post-test for multiple comparisons.



Figure 4b: Focal accumulation of DSB repair proteins after cisplatin treatment: 53BP1.

|               | Time after release from treatment |      |      |
|---------------|-----------------------------------|------|------|
|               | 6 h                               | 16 h | 24 h |
| wt vs. G12C   | ns                                | **** | **** |
| wt vs. G12D   | ns                                | **   | ns   |
| wt vs. G12V   | ns                                | **** | **** |
| G12C vs. G12D | ns                                | **** | **** |
| G12C vs. G12V | ns                                | **** | **** |
| G12D vs. G12V | ns                                | *    | **** |

Statistical analysis was performed using two-way ANOVA test and Bonferroni post-test for multiple comparisons.

Figure 4d: Focal accumulation of DSB repair proteins after cisplatin treatment: BRCA1.

|               | Time after release from treatment |      |      |
|---------------|-----------------------------------|------|------|
|               | 6 h                               | 16 h | 24 h |
| wt vs. G12C   | ns                                | ns   | **** |
| wt vs. G12D   | ns                                | ns   | ns   |
| wt vs. G12V   | ns                                | **   | ns   |
| G12C vs. G12D | ns                                | ns   | **** |
| G12C vs. G12V | ns                                | **** | **   |
| G12D vs. G12V | ns                                | **   | ns   |

Statistical analysis was performed using two-way ANOVA test and Bonferroni post-test for multiple comparisons.

Figure 4e: Focal accumulation of DSB repair proteins after cisplatin treatment: RAD51.

|               | Time after release from treatment |      |      |
|---------------|-----------------------------------|------|------|
|               | 6 h                               | 16 h | 24 h |
| wt vs. G12C   | ns                                | ns   | ns   |
| wt vs. G12D   | ns                                | ns   | ns   |
| wt vs. G12V   | ns                                | ***  | ns   |
| G12C vs. G12D | ns                                | ns   | ns   |
| G12C vs. G12V | ns                                | *    | ns   |
| G12D vs. G12V | ns                                | ***  | ns   |

Statistical analysis was performed using two-way ANOVA test and Bonferroni post-test for multiple comparisons.

Figure 5a: Growth inhibition assay: response of cells to treatment with UV light.

|               | UV light J/m <sup>2</sup> |    |    |    |    |    |
|---------------|---------------------------|----|----|----|----|----|
|               | 2                         | 5  | 10 | 15 | 20 | 25 |
| wt vs. G12C   | *                         | *  | *  | ** | ** | ** |
| wt vs. G12D   | **                        | ns | ns | ns | ns | ns |
| wt vs. G12V   | ns                        | ns | ns | ns | ns | ns |
| G12C vs. G12D | ns                        | ns | ns | ns | ns | ns |
| G12C vs. G12V | **                        | ns | ns | ns | ns | ns |
| G12D vs. G12V | ***                       | ns | ns | ns | ns | ns |

Statistical analysis was performed using two-way ANOVA test and Bonferroni post-test for multiple comparisons.

Figure 5d: DSB repair frequencies.

|               | HR | SSA  | NHEJ | MMEJ |
|---------------|----|------|------|------|
| wt vs. G12C   | ** | **** | **** | **** |
| wt vs. G12D   | *  | **** | **** | **** |
| wt vs. G12V   | ** | **** | **** | **** |
| G12C vs. G12D | ns | ns   | ns   | **   |
| G12C vs. G12V | ns | ns   | ns   | ns   |
| G12D vs. G12V | ns | ns   | ns   | ns   |

Statistical analysis was performed using one-way ANOVA test and Bonferroni post-test for multiple comparisons.

Figure 5e: Expression of DSB repair proteins.

|               | BACH1 |
|---------------|-------|
| wt vs. G12C   | ****  |
| wt vs. G12V   | ns    |
| wt vs. G12D   | **    |
| G12C vs. G12V | **    |
| G12C vs. G12D | ns    |
| G12V vs. G12D | *     |

Statistical analysis was performed using one-way ANOVA test and Bonferroni post-test for multiple comparisons.

Figure 5g: FANCD2 immunolabeled foci from 2 slides from independent experiments.

|               | Time after release from treatment |      |      |
|---------------|-----------------------------------|------|------|
|               | 6 h                               | 16 h | 24 h |
| wt vs. G12C   | ns                                | ns   | ns   |
| wt vs. G12D   | ns                                | ns   | *    |
| wt vs. G12V   | **                                | **** | **   |
| G12C vs. G12D | ns                                | ns   | ns   |
| G12C vs. G12V | ***                               | **** | ns   |
| G12D vs. G12V | ***                               | **** | ns   |

Statistical analysis was performed using two-way ANOVA test and Bonferroni post-test for multiple comparisons

Figure 6a: Growth inhibition assay: response of cells to MMS treatment detected by MTS assay.

|               | MMS $\mu$ M |     |      |      |      |      |     |
|---------------|-------------|-----|------|------|------|------|-----|
|               | 0.05        | 0.1 | 0.25 | 0.5  | 0.75 | 1    | 1.5 |
| wt vs. G12C   | ns          | ns  | **** | **** | **** | ***  | ns  |
| wt vs. G12D   | ns          | ns  | ns   | ns   | ns   | ns   | ns  |
| wt vs. G12V   | ns          | ns  | ns   | ns   | ns   | ns   | ns  |
| G12C vs. G12D | ns          | ns  | ***  | **** | **** | ***  | ns  |
| G12C vs. G12V | ns          | ns  | **** | **** | ***  | **** | ns  |
| G12D vs. G12V | ns          | ns  | ns   | ns   | *    | ns   | ns  |

Statistical analysis was performed using two-way ANOVA test and Bonferroni post-test for multiple comparisons.

Figure 6b–d: BER pathway components. Growth inhibition assay.

|               | Cisplatin $\mu$ M |      |      |      |    |
|---------------|-------------------|------|------|------|----|
|               | 0,625             | 1,5  | 2,5  | 5    | 10 |
| wt vs. G12C   | ns                | **   | *    | ***  | ns |
| wt vs. G12D   | ns                | ns   | ns   | ns   | ns |
| wt vs. G12V   | ns                | ns   | ns   | ns   | ns |
| G12C vs. G12D | ns                | **** | *    | **** | ns |
| G12C vs. G12V | ns                | **** | **** | **** | ns |
| G12D vs. G12V | ns                | ns   | ns   | ns   | ns |

Statistical analysis was performed using two-way ANOVA test and Bonferroni post-test for multiple comparisons.

| Cisplatin uM + MA |       |     |     |    |    |
|-------------------|-------|-----|-----|----|----|
|                   | 0,625 | 1,5 | 2,5 | 5  | 10 |
| wt vs. G12C       | ns    | ns  | ns  | ns | ns |
| wt vs. G12D       | ns    | *   | ns  | ns | ns |
| wt vs. G12V       | ns    | *   | ns  | ns | ns |
| G12C vs. G12D     | ns    | **  | ns  | ns | ns |
| G12C vs. G12V     | ns    | **  | *   | *  | ns |
| G12D vs. G12V     | ns    | ns  | ns  | ns | ns |

Statistical analysis was performed using two-way ANOVA test and Bonferroni post-test for multiple comparisons.

| Cisplatin uM + PA |       |     |     |    |    |
|-------------------|-------|-----|-----|----|----|
|                   | 0,625 | 1,5 | 2,5 | 5  | 10 |
| wt vs. G12C       | ns    | ns  | ns  | ns | ns |
| wt vs. G12D       | ns    | ns  | ns  | ns | ns |
| wt vs. G12V       | ns    | ns  | ns  | ns | ns |
| G12C vs. G12D     | ns    | ns  | ns  | ns | ns |
| G12C vs. G12V     | ns    | ns  | ns  | ns | ns |
| G12D vs. G12V     | ns    | ns  | ns  | ns | ns |

Statistical analysis was performed using two-way ANOVA test and Bonferroni post-test for multiple comparisons.

Figure 7a: Caspase 3 and 7 activation: wild-type and mutant KRAS clones were treated with cisplatin, PA or MA (alone or in combination with cisplatin).

|                        | wt   | G12C | G12D | G12V |
|------------------------|------|------|------|------|
| Ctr vs. cisplatin      | **** | ns   | **** | **** |
| Ctr vs. PA             | ns   | ns   | ns   | ns   |
| Ctr vs. PA+cisplatin   | **** | **** | **** | **** |
| Ctr vs. METO           | ns   | ns   | ns   | ns   |
| Ctr vs. METO+cisplatin | *    | *    | *    | ns   |

Statistical analysis was performed using two-way ANOVA test and Bonferroni post-test for multiple comparisons.

Supplementary Figure S1b: Growth inhibition assay: response of cells to melphalan treatment detected by MTS assay.

| Melphalan uM  |     |    |     |    |    |    |    |     |
|---------------|-----|----|-----|----|----|----|----|-----|
|               | 2.5 | 10 | 20  | 30 | 40 | 60 | 80 | 100 |
| wt vs. G12C   | ns  | ns | ns  | ns | ns | ns | ns | ns  |
| wt vs. G12D   | ns  | ns | ns  | ns | ns | ns | ns | ns  |
| wt vs. G12V   | ns  | ** | *** | *  | ns | ns | ns | ns  |
| G12C vs. G12D | ns  | ns | ns  | ns | ns | ns | ns | ns  |
| G12C vs. G12V | ns  | ns | ns  | ns | ns | ns | ns | ns  |
| G12D vs. G12V | ns  | ns | **  | ns | ns | ns | ns | ns  |

Statistical analysis was performed using two-way ANOVA test and Bonferroni post-test for multiple comparisons.

Supplementary Figure S1c: Graphical presentation of ATM phosphorylation.

|               | Time after treatment start |      |      |      |
|---------------|----------------------------|------|------|------|
|               | 2 h                        | 16 h | 24 h | 48 h |
| wt vs. G12C   | ns                         | **** | *    | **   |
| wt vs. G12D   | ns                         | ns   | *    | ns   |
| wt vs. G12V   | ns                         | ns   | ns   | ns   |
| G12C vs. G12D | ns                         | ***  | **** | ***  |
| G12C vs. G12V | ns                         | **** | **   | ns   |
| G12D vs. G12V | ns                         | *    | ns   | *    |

Statistical analysis was performed using two-way ANOVA test and Bonferroni post-test for multiple comparisons.

Supplementary Figure S3c: Growth inhibition assay: response of cells to X-ray treatment.

|               | X-Ray Gy |    |     |    |    |
|---------------|----------|----|-----|----|----|
|               | 0.5      | 1  | 2.5 | 5  | 10 |
| wt vs. G12C   | ns       | ns | ns  | ns | ns |
| wt vs. G12D   | ns       | ns | *   | ** | ns |
| wt vs. G12V   | ns       | ns | ns  | ns | ns |
| G12C vs. G12D | ns       | ns | ns  | ns | ns |
| G12C vs. G12V | ns       | ns | ns  | ns | ns |
| G12D vs. G12V | ns       | ns | ns  | ns | ns |

Statistical analysis was performed using two-way ANOVA test and Bonferroni post-test for multiple comparisons.

Supplementary Figure S4c: POL $\beta$  quantification.

|               | POLB |
|---------------|------|
| wt vs. G12C   | ***  |
| wt vs. G12V   | ns   |
| wt vs. G12D   | ns   |
| G12C vs. G12V | *    |
| G12C vs. G12D | ***  |
| G12V vs. G12D | ns   |

Statistical analysis was performed using one-way ANOVA test and Bonferroni post-test for multiple comparisons.

Figure S4f: Graphical presentation of ATM phosphorylation.

|                        | wt | G12C | G12D | G12V |
|------------------------|----|------|------|------|
| Ctr vs. cisplatin      | ** | ns   | **   | **   |
| Ctr vs. PA             | ns | ns   | ns   | ns   |
| Ctr vs. PA+cisplatin   | ** | **   | **   | **   |
| Ctr vs. METO           | ns | ns   | ns   | ns   |
| Ctr vs. METO+cisplatin | ** | **   | **   | **   |

Statistical analysis was performed using two-way ANOVA test and Bonferroni post-test for multiple comparisons.

Supplementary Figure S5a: Growth inhibition assay: response of cells to MMS treatment detected by MTS assay.

|                         | MMS uM |     |      |     |      |    |     |
|-------------------------|--------|-----|------|-----|------|----|-----|
|                         | 0.05   | 0.1 | 0.25 | 0.5 | 0.75 | 1  | 1.5 |
| wt vs. G12C cl.2        | ns     | ns  | **   | **  | **   | *  | ns  |
| wt vs. G12C cl.4        | ns     | ns  | ***  | *** | ***  | *  | ns  |
| G12C cl.2 vs. G12C cl.4 | ns     | *   | ns   | ns  | ns   | ns | ns  |

Statistical analysis was performed using two-way ANOVA test and Bonferroni post-test for multiple comparisons.

Supplementary Figure S5g: Caspase 3 and 7 activation: KRAS(G12C) clone was treated with cisplatin, pamoic acid or meyhoxamine (alone or in combination with cisplatin).

|                  | G12C cl.4 |           |
|------------------|-----------|-----------|
|                  | Control   | Treatment |
| Ctr vs. DDP      |           | ns        |
| Ctr vs. PA       |           | ns        |
| Ctr vs. PA_DDP   |           | ****      |
| Ctr vs. METO     |           | ns        |
| Ctr vs. METO_DDP |           | ns        |

Statistical analysis was performed using two-way ANOVA test and Bonferroni post-test for multiple comparisons.

Supplementary Figure S5h: Growth inhibition assay: response of cells to cisplatin or cisplatin plus pamoic acid treatment detected by MTS assay.

|                           | Cisplatin uM |      |      |      |      |
|---------------------------|--------------|------|------|------|------|
|                           | 1.5          | 2.5  | 5    | 7.5  | 10   |
| wt cl.10 vs. G12C cl.18   | ***          | ns   | ns   | ***  | ***  |
| wt cl.10 vs. G12D cl.11   | *            | ns   | **   | ***  | ***  |
| wt cl.10 vs. G12V cl.31   | ****         | **** | **** | **** | **** |
| G12C cl.18 vs. G12D cl.11 | ****         | ***  | **** | **** | **** |
| G12C cl.18 vs. G12V cl.31 | ****         | **** | **** | **** | **** |
| G12D cl.11 vs. G12V cl.31 | ns           | **   | ***  | ns   | ns   |

Statistical analysis was performed using two-way ANOVA test and Bonferroni post-test for multiple comparisons.

|                           | Cisplatin uM + Pamoic Acid |      |      |      |      |
|---------------------------|----------------------------|------|------|------|------|
|                           | 1.5                        | 2.5  | 5    | 7.5  | 10   |
| wt cl.10 vs. G12C cl.18   | ns                         | ns   | ***  | **** | **** |
| wt cl.10 vs. G12D cl.11   | **                         | *    | ***  | **** | ***  |
| wt cl.10 vs. G12V cl.31   | **                         | **** | **** | **** | ***  |
| G12C cl.18 vs. G12D cl.11 | ns                         | ns   | ns   | ns   | ns   |
| G12C cl.18 vs. G12V cl.31 | ns                         | **   | ns   | ns   | ns   |
| G12D cl.11 vs. G12V cl.31 | ns                         | ns   | ns   | ns   | ns   |

Statistical analysis was performed using two-way ANOVA test and Bonferroni post-test for multiple comparisons.

**Supplementary Table S2: Percentage of cells in the cell cycle phase analysis presented in Figure 1E**

|                      | KRAS(wt)       |      |                   | KRAS(G12C)     |      |                   | KRAS(G12D)     |      |                   | KRAS(G12V)     |      |                   |
|----------------------|----------------|------|-------------------|----------------|------|-------------------|----------------|------|-------------------|----------------|------|-------------------|
|                      | G <sub>1</sub> | S    | G <sub>2</sub> /M | G <sub>1</sub> | S    | G <sub>2</sub> /M | G <sub>1</sub> | S    | G <sub>2</sub> /M | G <sub>1</sub> | S    | G <sub>2</sub> /M |
| Ctrl 24 h            | 34.7           | 49.5 | 15.8              | 31.4           | 53.8 | 14.8              | 34.5           | 50.7 | 14.4              | 33.3           | 50.4 | 16.3              |
| Ctrl 48 h            | 51.6           | 37.8 | 10.6              | 66.6           | 25.2 | 8.2               | 50.7           | 40.1 | 9.2               | 52.4           | 36.8 | 10.8              |
| 24 h after treatment | 12.9           | 47.2 | 39.9              | 33.4           | 47.1 | 19.5              | 19.0           | 51.2 | 29.8              | 17.3           | 51.2 | 31.6              |
| 48 h after treatment | 31.5           | 41.4 | 27.1              | 52.0           | 35.6 | 12.4              | 36.7           | 45.3 | 18.0              | 34.7           | 44.9 | 20.4              |
